# Supplementary material
Source: PubMed Central journal article supplement (PMC4248014)

# Supplementary figure 1

A

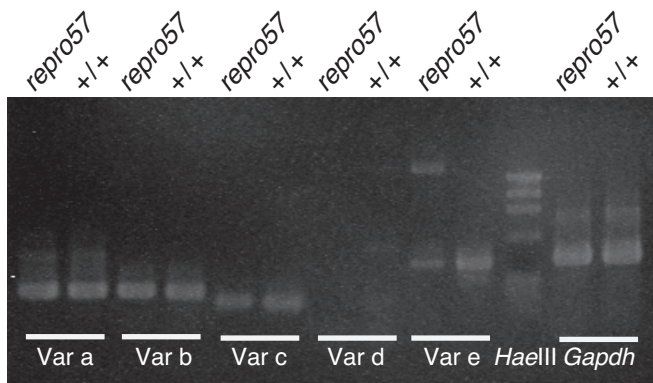

variant a F: AGGTACAAAGAATGAATGCGT  
R: AGAAAGCTACTAACCTCCTCC

variant b F: GAAAAACACAGGAGGAGATTTCC  
R: ACTCTATTCTGTCAGGGGAGTG

variant c F: CCTGCCTCCTCAAACAAACTC  
R: GCTACTAACCTCCTCCTGTGT

variant d F: GTACACATGGAAGGACCCAGG  
R: AGGGGATGCTGATCCTGCTAG

variant e F: AGAGTACACATGGAAGGACCC  
R: TGTGATGCTGGAGGTGGTGAC

Gapdh F: GGCAAATTCAACGGCACAGTC  
R: GAGGGGCCATCCACAGTCTTC

B

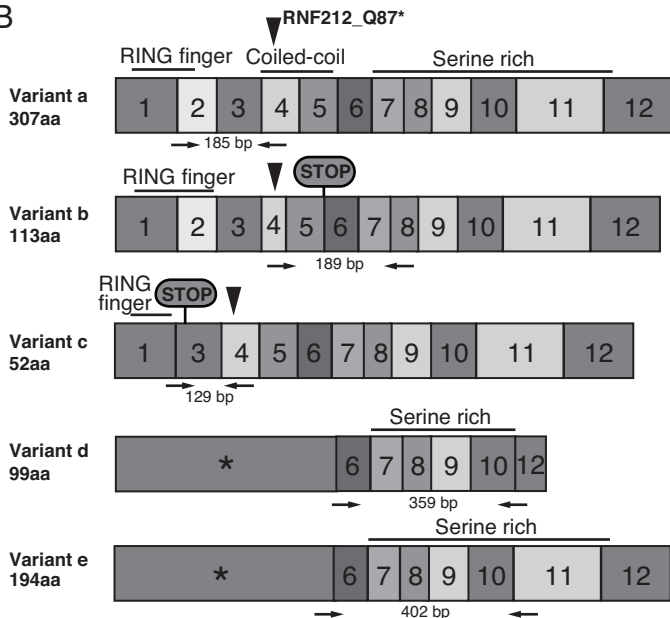

Supplement: NIHMS638191-supplement-1.pdf [file NIHMS638191-supplement-1.pdf]
